# Supplementary material
Source: Springer Nature journal article supplement (https://www.springermedizin.de/resource/supplementary/12933_2004_25_MOESM2_ESM.pdf/9539438)
Supplement: MOESM2 [file 9539438]

## ANGIOGENESIS: **Induced**

VEGF and  
Hif-1 induced  
eNOS and eNO  
dysfunction

## PROANGIOGENIC (Vascular Paradox)

## ARTERIOGENESIS: **Impaired**

Increased PAI-1  
Impaired monocyte migration  
Dysfunction of eNOS and eNO

## PROINFLAMMATORY

Monocyte → Macrophage  
MCP-1 (RS) NFkappaB

## PRO OX-REDOX STRESS

ROS: a driving force

## ATHEROSCLEROPATHY

MS, PD, T2DM  
ADIPOCYTE: OBESITY  
IL-1, IL-6, TNF alpha,  
hs CRP, PAI-1

## PROFIBROTIC

Remodeling:  
Redox sensitive (RS): MMPs  
vSMC

## PROTHROMBOTIC

Hyperactive platelet  
^ Tissue Factor  
^ PAI-1
